# Supplementary material
Source: PubMed Central journal article supplement (PMC3133220)
Supplement: supp_31_9_1833__1.pdf [file supp_31_9_1833__1.pdf]

Iyengar\_Supplementary Table S1. Summary of ChIP-seq experiments

| Library Number      | Sample Name                 | Antibody used | Ab catalog number | Flowcell                        | Lane | Unique Reads | Peaks   | GEO accession number |
|---------------------|-----------------------------|---------------|-------------------|---------------------------------|------|--------------|---------|----------------------|
| UCD281 repA         | HEK293_FLAG WT-KAP1         | Flag          | Sigma F1804       | 091222_SOLEXA2_FC60006AAXX*     | 6    | 8,290,885    | 6,347   | in progress          |
| UCD281 repA         | HEK293_FLAG WT-KAP1         | Flag          | Sigma F1804       | 091212_SOLEXA2_FC612RDAAXX*     | 7    | 7,832,504    | 5,515   | in progress          |
| UCD281 repA_merged  | HEK293_FLAG WT-KAP1_merged  | Flag          | Sigma F1804       | n.a.                            | n.a. | 15,625,597   | 26,887  | in progress          |
| UCD281 repA         | HEK293_FLAG WT-KAP1         | Flag          | Sigma F1804       | 101025_KOJAK_00017_FC62P3W      | 3    | 15,249,940   | 23,106  | in progress          |
| UCD281_merged       | HEK293_FLAG WT-KAP1_merged  | Flag          | Sigma F1804       | n.a.                            | n.a. | 30,687,571   | 95,403  |                      |
| UCD313 repB         | HEK293_Kap1                 | Kap1          | Ab10483           | 100122_SOLEXA3_FC61F5HAAXX*     | 3    | 13,010,363   | 31,535  | in progress          |
| UCD313 repB         | HEK293_Kap1                 | Kap1          | Ab10483           | 101025_KOJAK_00017_FC62P3W      | 4    | 23,935,060   | 86,041  | in progress          |
| UCD313_merged       | HEK293_Kap1_merged          | Kap1          | Ab10483           | n.a.                            | n.a. | 36,670,459   | 165,890 | in progress          |
| UCD334              | HEK293_FLAG M2-KAP1         | Flag          | Sigma F1804       | 100220_SOLEXA2_FC61F74AAXX      | 4    | 16,376,905   | 4,966   | in progress          |
| UCD312              | HEK293_FLAG ΔRBCC-KAP1      | Flag          | Sigma F1804       | 100122_SOLEXA3_FC61F5HAAXX*     | 2    | 14,634,579   | 1,090   | in progress          |
| UCD335              | HEK293_FLAG ΔPB-KAP1        | Flag          | Sigma F1804       | 100220_SOLEXA2_FC61F74AAXX      | 5    | 18,269,655   | 48,195  | in progress          |
| UCD434              | HEK293_FLAG Δ(RBCC+PB)-KAP1 | Flag          | Sigma F1804       | 100908_SOLEXA2_0908_FC628CFAAXX | 2    | 18,145,057   | 12,273  | in progress          |
| UCD283              | Input HEK293                | none          | none              | 091208_SOLEXA2_FC612P9AAXX*     | 6    | n.a.         | n.a.    | in progress          |
| UCD291              | Input HEK293                | none          | none              | 091218_SOLEXA2_FC600H7AAXX*     | 6    | n.a.         | n.a.    | in progress          |
| UCD314              | Input HEK293                | none          | none              | 100122_SOLEXA3_FC61F5HAAXX*     | 5    | n.a.         | n.a.    | in progress          |
| UCD336              | Input HEK293                | none          | none              | 100220_SOLEXA2_FC61F74AAXX*     | 6    | n.a.         | n.a.    | in progress          |
| HEK293 input_merged | Input HEK293_merged         | none          | none              | n.a.                            | n.a. | 60,749,104   | n.a.    | in progress          |
| UCD340              | U2OS K4/WT_Kap1             | Kap1          | Ab10483           | 100211_SOLEXA1_FC61F5YAAXX      | 8    | 17,585,781   | 71,441  | in progress          |
| UCD337              | Input U2OS K4/WT            | none          | none              | 100302_SOLEXA2_FC6147KAAXX      | 4    | 18,937,878   | n.a.    | in progress          |
| UCD448              | HEK293_ELK4                 | ELK4          | sc13030-X         | 101103_SPADE_00034_FC62NRM      | 7    | 12,477,562   | 1,808   | in progress          |
| UCD449              | HEK293_ELK4                 | ELK4          | sc13030-X         | 101103_SPADE_00034_FC62NRM      | 8    | 29,491,285   | 778     | in progress          |
| ELK4_merged         | HEK293_ELK4_merged          | ELK4          | sc13030-X         | n.a.                            | n.a. | 41,752,051   | 3,173   | in progress          |

\*Originally mapped to genome version HG18, subsequently remapped to genome version HG19-Female
